# Supplementary material for: Development and Initial Validation of the Chinese Version of the Florida Surgical Questionnaire for Parkinson’s Disease
Source: Hindawi journal article supplement (doi:10.1155/2020/8811435), 2020-12-12
Supplement: f1 [file 8811435.f1.pdf]

患者姓名: \_\_\_\_\_

患者电话: \_\_\_\_\_

患者保险: \_\_\_\_\_

评估日期: \_\_\_\_\_

评估者: \_\_\_\_\_

评估地点: \_\_\_\_\_

请确保你的病人符合英国伦敦脑库帕金森病诊断标准 (Hughs, et. al.) 的原发性帕金森病诊断:

### A. 原发性帕金森病诊断

诊断 1: 是否存在动作迟缓? **是/否** (请画圈作答)

诊断 2: (如存在请打勾):

强直 (肩膀、腿或颈部僵硬)

4-6 赫兹静止性震颤

不是由原发性视觉、前庭、小脑、本体感受器功能障碍所致姿势不稳定

你的病人是否符合以上至少 2 项? **是/否** (请画圈作答)

诊断 3: (如存在请打勾):

单侧起病

存在静止性震颤

进展性疾病

持续的、非对称性, 起病侧更重

对左旋多巴反应良好 (70-100%)

左旋多巴所致严重运动障碍

左旋多巴有效 5 年及以上

临床病程 5 年及以上

你的病人是否符合以上至少 3 项? **是/否** (请画圈作答)

(对 3 个问题均作答“是”提示诊断原发性帕金森病)

### B. 提示为非原发性 PD 的表现

原始反射

1- 红旗 - 存在抓握反射、噁嘴反射、觅食反射或迈尔森征

N/A - 无/不详

存在核上性凝视麻痹

1- 红旗 - 存在核上性凝视麻痹

N/A - 无/不详

存在观念运动性失用

1- 红旗 - 存在观念运动性失用

N/A – 无/不详

存在自主神经功能障碍

1- 红旗 - 发病 1-2 年存在非药物性新发严重直立性低血压、勃起功能障碍或其他自主神经功能紊乱

N/A – 无/不详

存在阔基步态

1- 红旗 - 存在阔基步态

N/A – 无/不详

存在轻度以上痴呆

1- 红旗 - 频繁定向障碍、严重认知困难、严重记忆困难或命名障碍

N/A – 无, 不详

存在严重精神病

1- 红旗 - 存在严重药物难治性精神病

N/A – 无, 不详

左旋多巴无效治疗史

1- 红旗- 帕金森症明显对左旋多巴治疗无反应, 或病人从未服用过左旋多巴, 或没有经历完整的左旋多巴治疗方案

N/A – 无, 不详

(上述任何“红旗标记”可能是手术禁忌症)

**C. 病人特征 (请圈出最能说明你帕金森病手术候选人特征的答案):**

1. 年龄:

0 - >80

1 - 71-80

2 - 61-70

3 - <61

2. 帕金森症状病程:

0 - <3 年

1 - 4-5 年

2 - >5 年

3. 症状波动 (剂末现象, 在异动症和运动不能间波动)?

0 - 否

1 - 是

4. 异动症

0 - 无

1 - <50%的时间

2 - >50%的时间

5. 肌张力障碍

0 - 无

1 - <50%的时间

2 - >50%的时间

一般病人特征，总分\_\_\_\_\_

#### D. 有利/不利因素

##### 6. 冻结步态

- 0-在“开”期中最好时，左旋多巴对其无效
- 1-在“开”期中最好时，左旋多巴对其有效
- NA-不适用

##### 7. 姿势不稳定性

- 0-在“开”期中最好时，左旋多巴对其无效
- 1-在“开”期中最好时，左旋多巴对其有效
- NA-不适用

##### 8. 华法令或其他抗凝血疗法

- 0-除了抗血小板治疗，正在服用华法令或其他抗凝血剂
- 1-除了抗血小板治疗，未服用华法令或其他抗凝血剂

##### 9. 认知功能：

- 0-记忆困难或额叶功能缺陷
- 1-无认知功能障碍症状或体征

##### 10. 吞咽功能

- 0-频繁哽噎或误吸
- 1-有时哽噎
- 2-很少哽噎
- 3-无吞咽困难

##### 11. 二便控制

- 0-二便失禁
- 1-仅尿失禁
- 2-无失禁

##### 12. 抑郁

- 0-严重抑郁伴自主神经症状
- 1-已治疗，中度抑郁
- 2-轻度抑郁症状
- 3-无抑郁

##### 13. 精神病：

- 0-频繁幻觉
- 1-偶尔幻觉-很可能为药物相关
- 2-无幻觉

有利/不利特征，总分\_\_\_\_\_

#### E. 药物试验（圈出最佳答案）

##### 14. 左旋多巴疗效：

- 0 不确定左旋多巴是否有效，或无左旋多巴治疗史

1-左旋多巴中度改善症状

2-左旋多巴显著改善症状

15. 复合左旋多巴，如息宁（卡比多巴/左旋多巴）、美多芭或等效药物：

0-没用过或每天不足3次

1-每天3次

2-每天4次

3-每天大于4次

16. 多巴胺受体激动剂试验：

0-无试验或每天不足3次

1-多巴胺受体激动剂每天3次

2-多巴胺受体激动剂每天4次

3-多巴胺受体激动剂每天大于4次

17. 息宁增效剂试验

0-没用过

1-托卡朋或恩他卡朋试验

18. 联合息宁或多巴胺受体激动剂等效药物试验

0-无试验

1-息宁或多巴胺受体激动剂等效药物试验

药物试验分项得分：\_\_\_\_\_

**FLASQ-PD 得分：**

A. 符合原发性 PD 诊断标准：是/否

B. 禁忌症（FLAGS），得分：\_\_\_\_\_（8分可能，任何红旗标记意味着可能不是良好的手术候选病人）

C. 一般特征，得分\_\_\_\_\_（10分可能）

D. 有利/不利特征，得分：\_\_\_\_\_（14分可能）

E. 药物试验，得分\_\_\_\_\_（10分可能）

量表总分（C+D+E）：\_\_\_\_\_（34分可能）

存在难治性震颤： 是/否

是/否（部分患者存在大剂量左旋多巴、或者左旋多巴联合多巴胺受体激动剂、抗胆碱能药物治疗无效的中、重度震颤，可不依赖上述评分做出手术决定）
